# Supplementary material
Source: Hindawi journal article supplement (doi:10.1155/2024/5702517)

# Ctrl-Exo

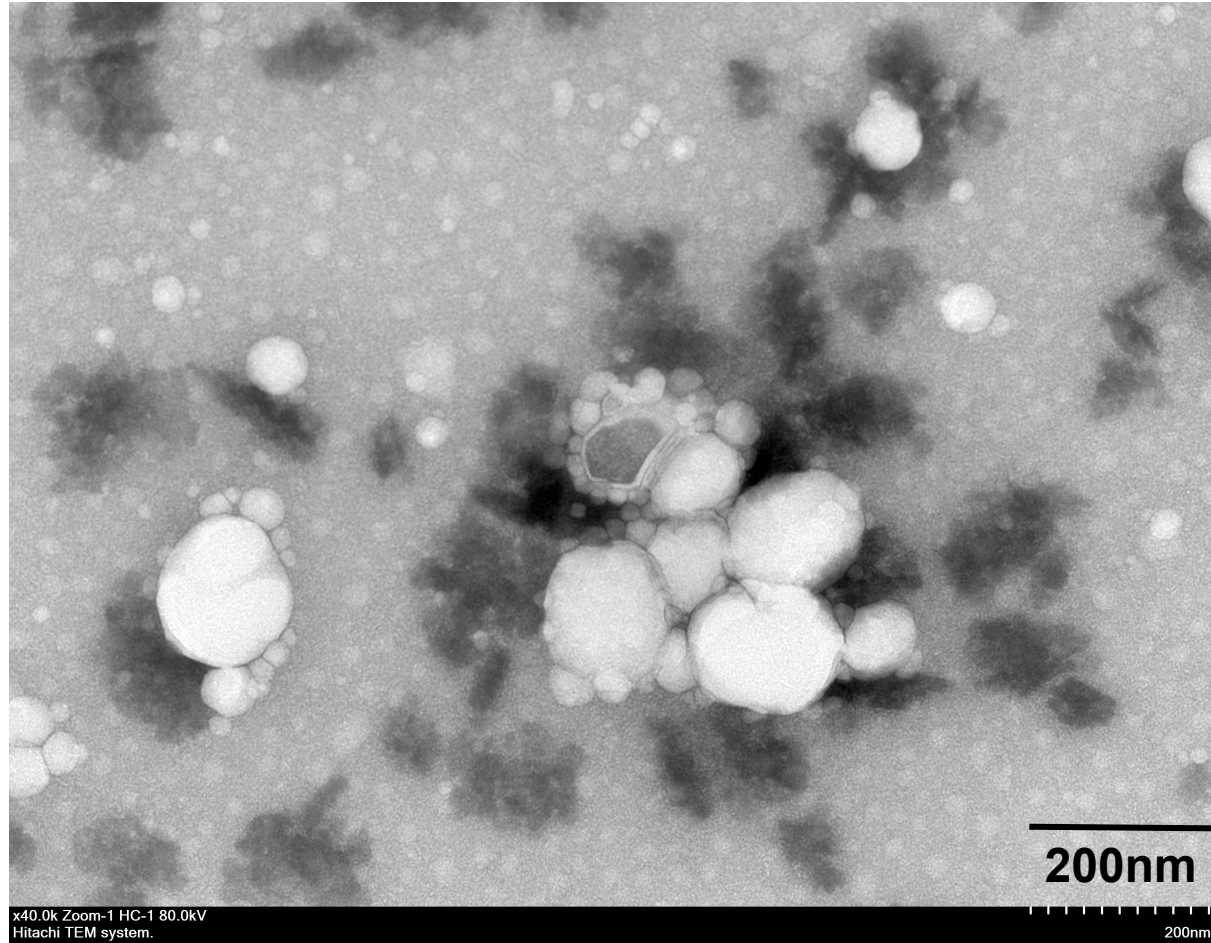

# Model-Exo

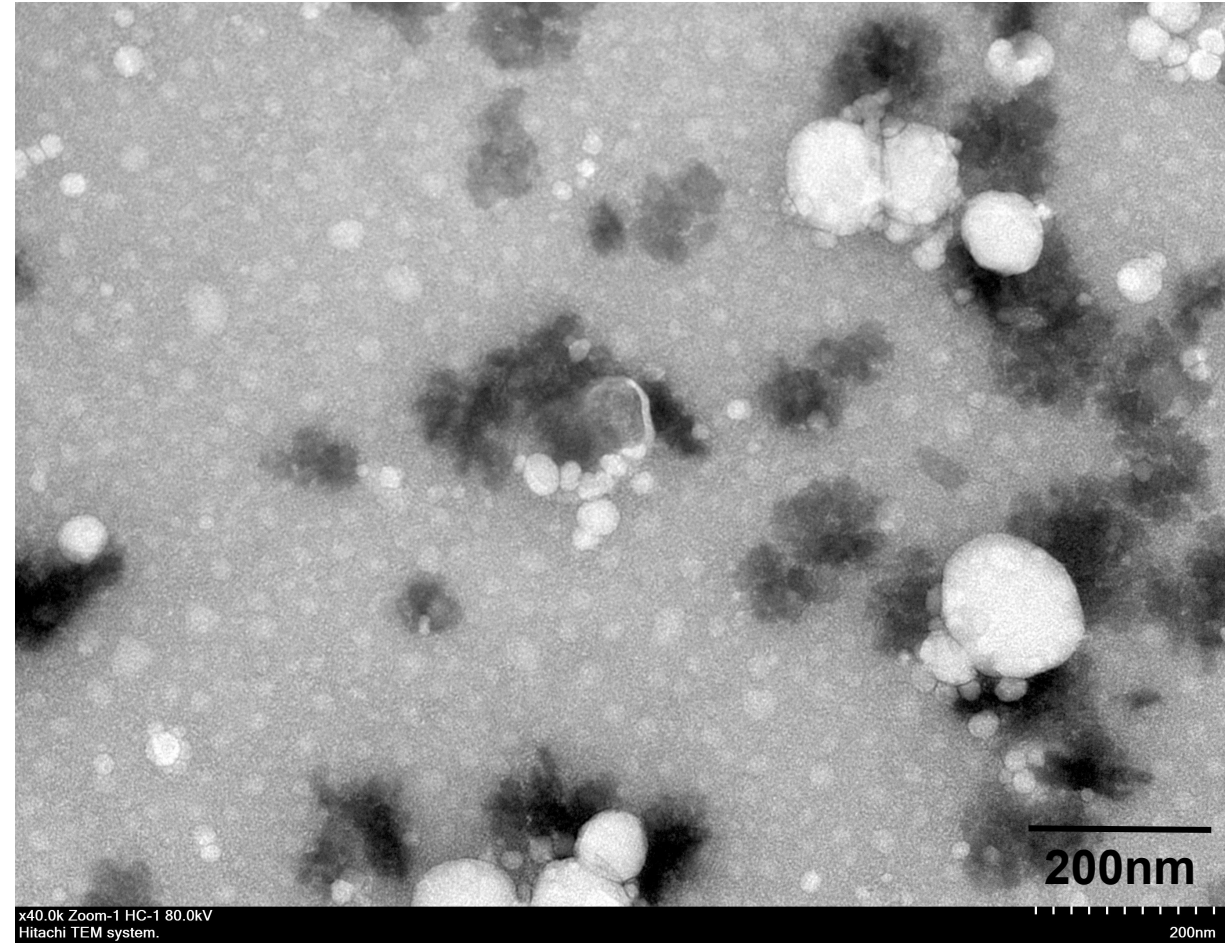

Supplement: f1 [file 5702517.f1.pdf]
